# Supplementary material for: World Health Organization (WHO) COVID-19 Database: WHO Needs It?
Source: Preprints.org preprint supplement (doi:10.20944/preprints202007.0051.v1), 2020-07-05
Supplement: Supplementary file 1 [file Supplement 1.xlsx]

## Sheet: Sheet1
ID
