# Supplementary material for: World Health Organization (WHO) COVID-19 Database: WHO Needs It?
Source: Preprints.org preprint supplement (doi:10.20944/preprints202007.0051.v1), 2020-07-05
Supplement: Supplementary file 2 [file supplementary]

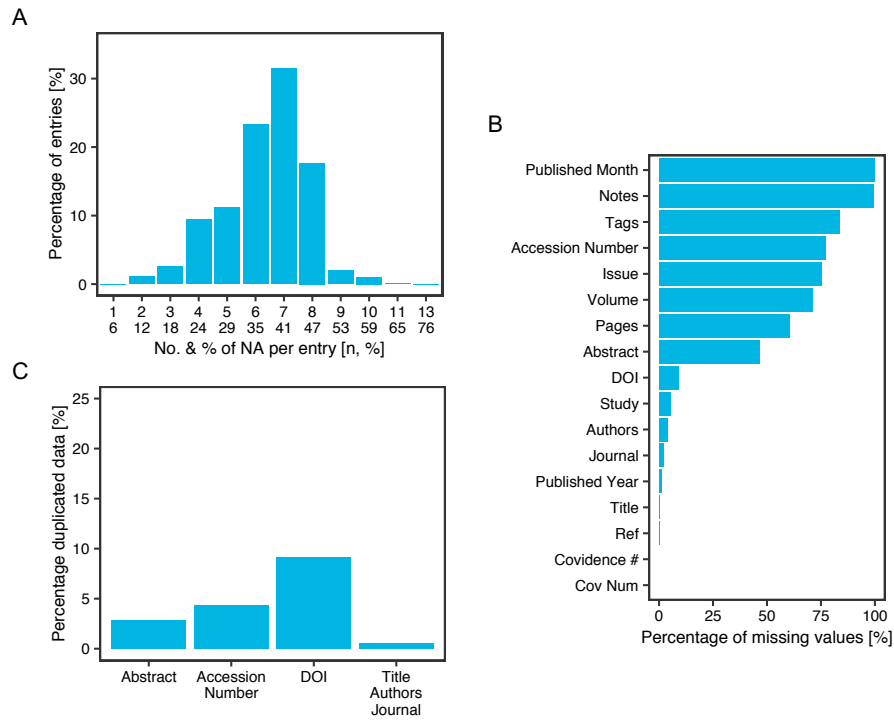

**Supp. figure 3. Missing and duplicate values in WHO COVID-19 database (acquired on 2020-05-19). A)** Percentage of entries with indicated number of missing values. **B)** Percentage of missing values per category (variable). **C)** Percentage of duplicated data per category after missing values are excluded.
